# Supplementary material
Source: MDPI journal article supplement (https://www.mdpi.com/2072-4292/11/10/1201)
Supplement: s1 [file s1]

## Supplementary Material

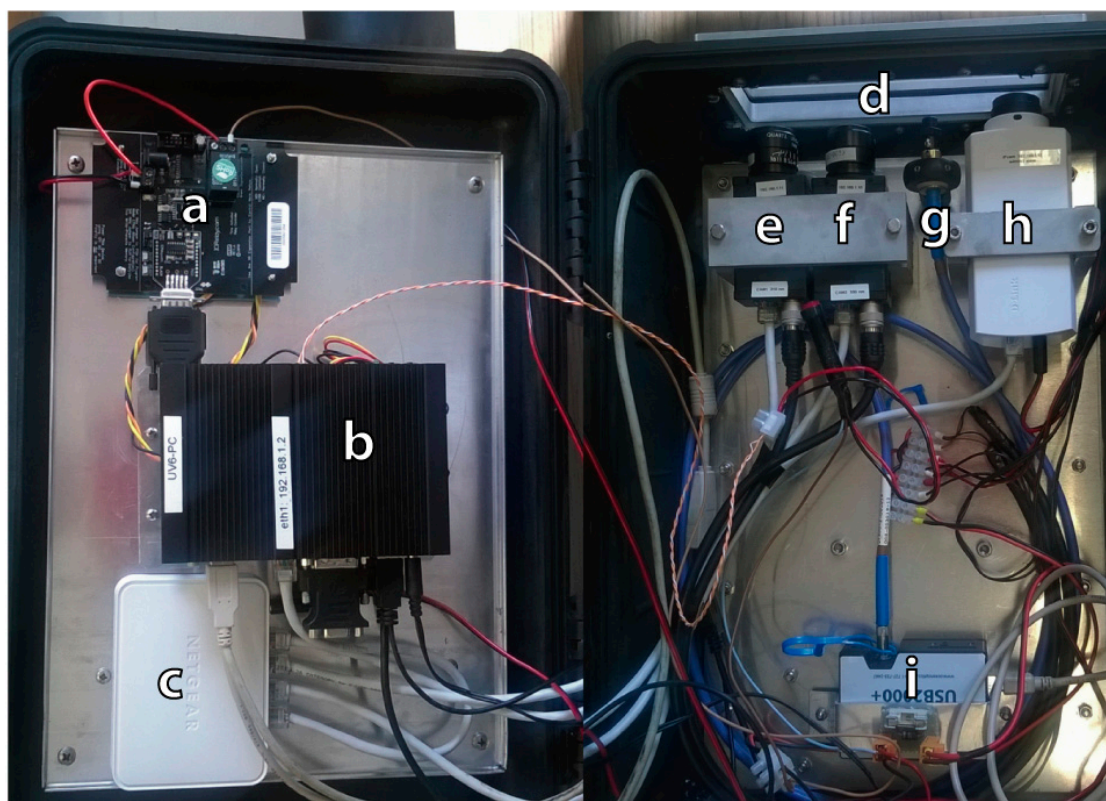

**Figure S1. Internal view of UV camera system showing a) GPS module, b) Acquisition module, c) ethernet switch, d) quartz window, e) UV camera with 310 nm filter, f) UV camera with 330 nm filter, g) fiber optic, h) visible camera, and i) UV spectrometer.**
